# Supplementary material
Source: PubMed Central journal article supplement (PMC4113464)

Figure e-1 Age-dependent changes in NPT

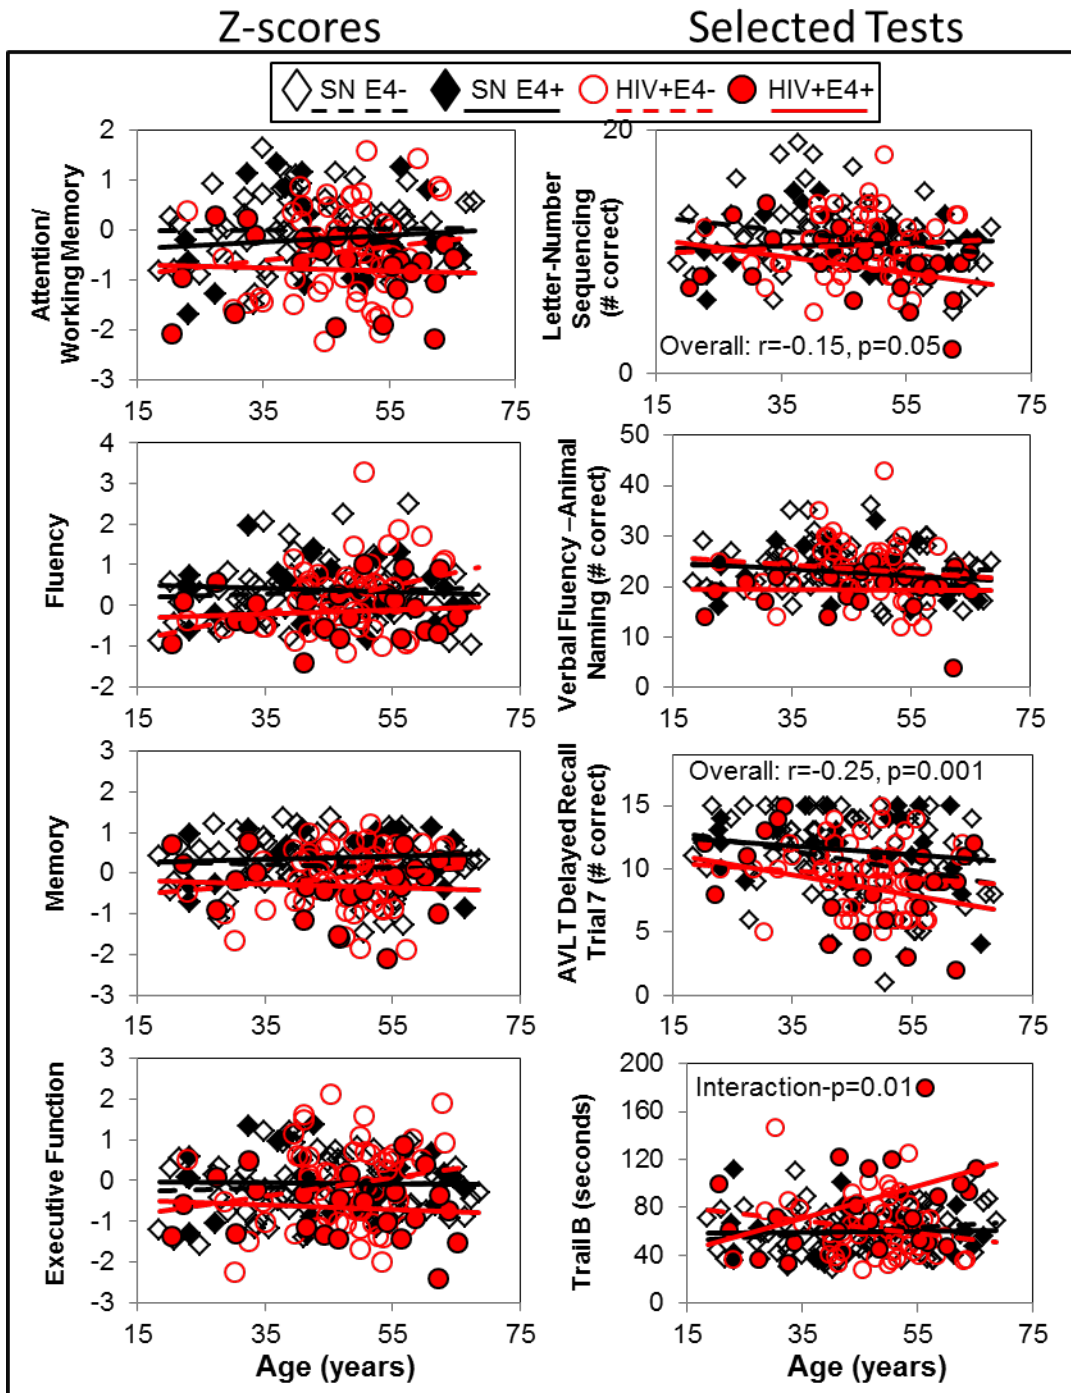

Supplement: supp_WNL.0000000000000526_Figure_e-1.pdf [file supp_WNL.0000000000000526_Figure_e-1.pdf]
